# Supplementary material
Source: PubMed Central journal article supplement (PMC7986592)
Supplement: supplementaryfigures-revised_bbaa233.pdf [file supplementaryfigures-revised_bbaa233.pdf]

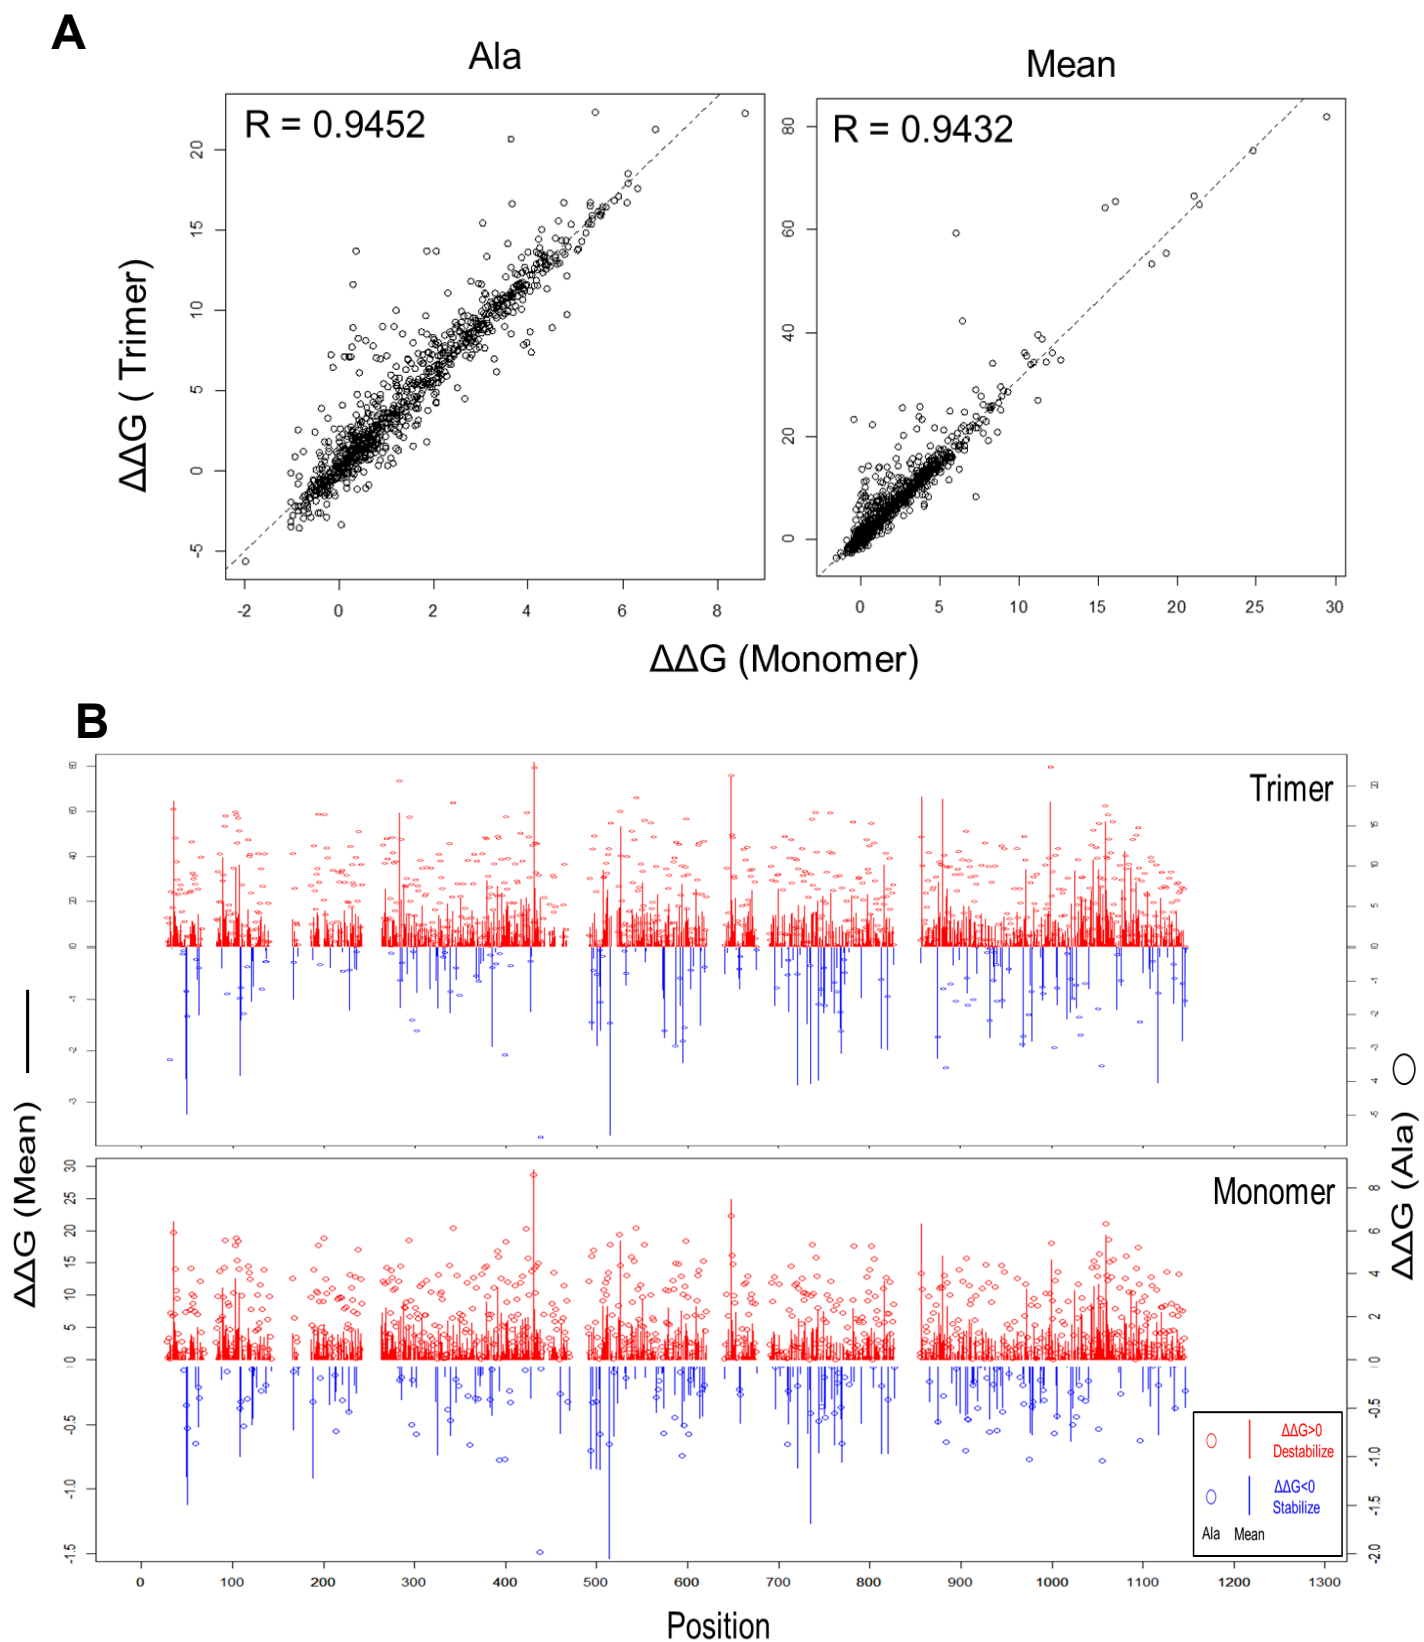

**Supplementary Figure 1. (A)** Folding energy changes for  $\Delta\Delta G$  of substitutions to Alanine (left) and  $\Delta\Delta G$  mean of residues (right) in SARS-CoV-2 S trimer and monomer. **(B)** Line charts summarize the folding energy changes for  $\Delta\Delta G$  mean of residues (bar) and  $\Delta\Delta G$  of substitutions to alanine (circle) in SARS-CoV-2 S trimer and monomer.

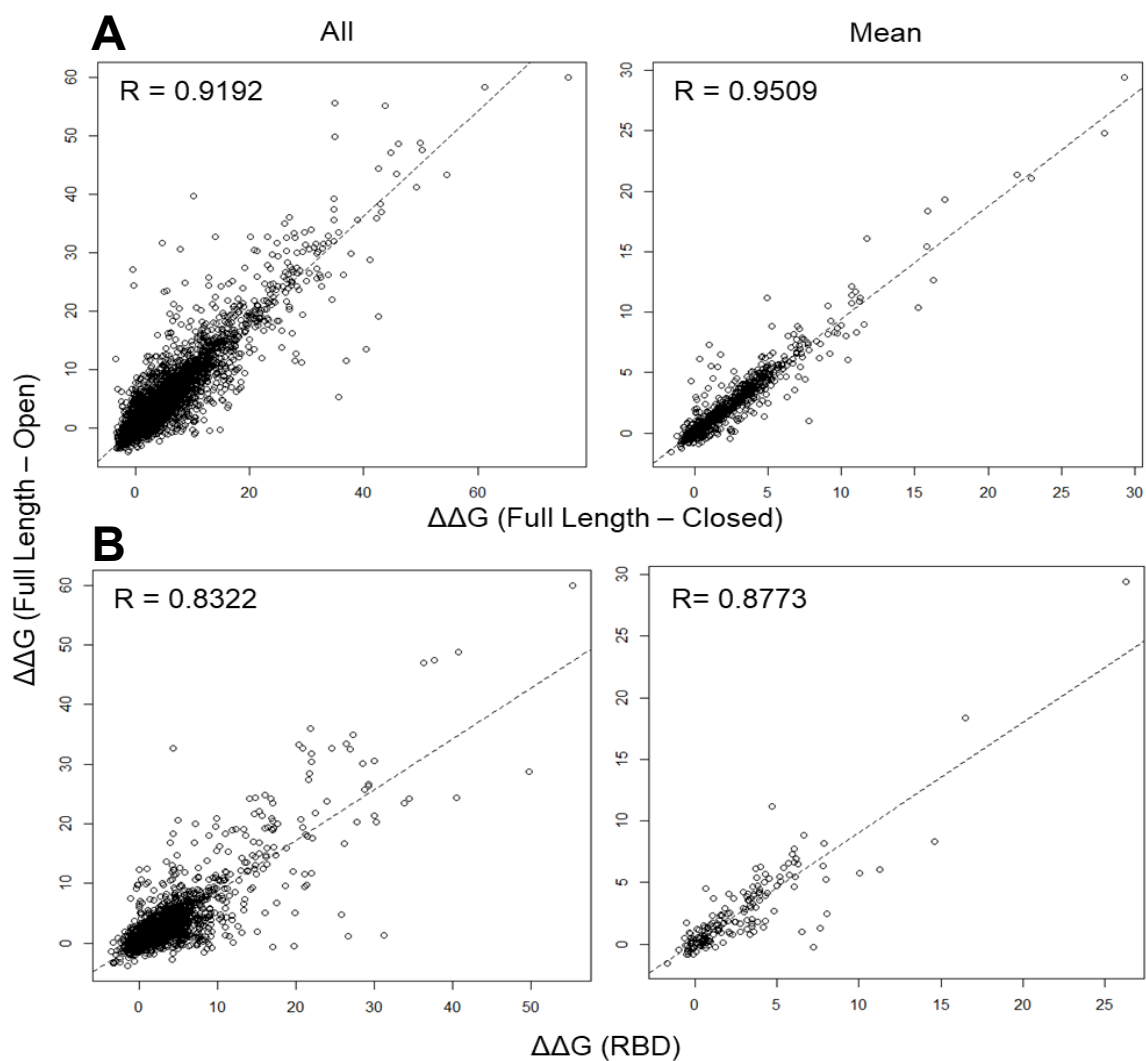

**Supplementary Figure 2.** Folding energy changes for  $\Delta\Delta G$  of substitutions to Alanine (left) and  $\Delta\Delta G$  mean of residues (right) in **(A)** the cryo-EM structures of SARS-CoV-2 S in closed state and open state and **(B)** the crystal structure of RBD and cryo-EM structure of SARS-Cov-2 S RBD. The folding energy change ( $\Delta\Delta G$ ) is computed based on the A chains of 6VYB and 6VXX.

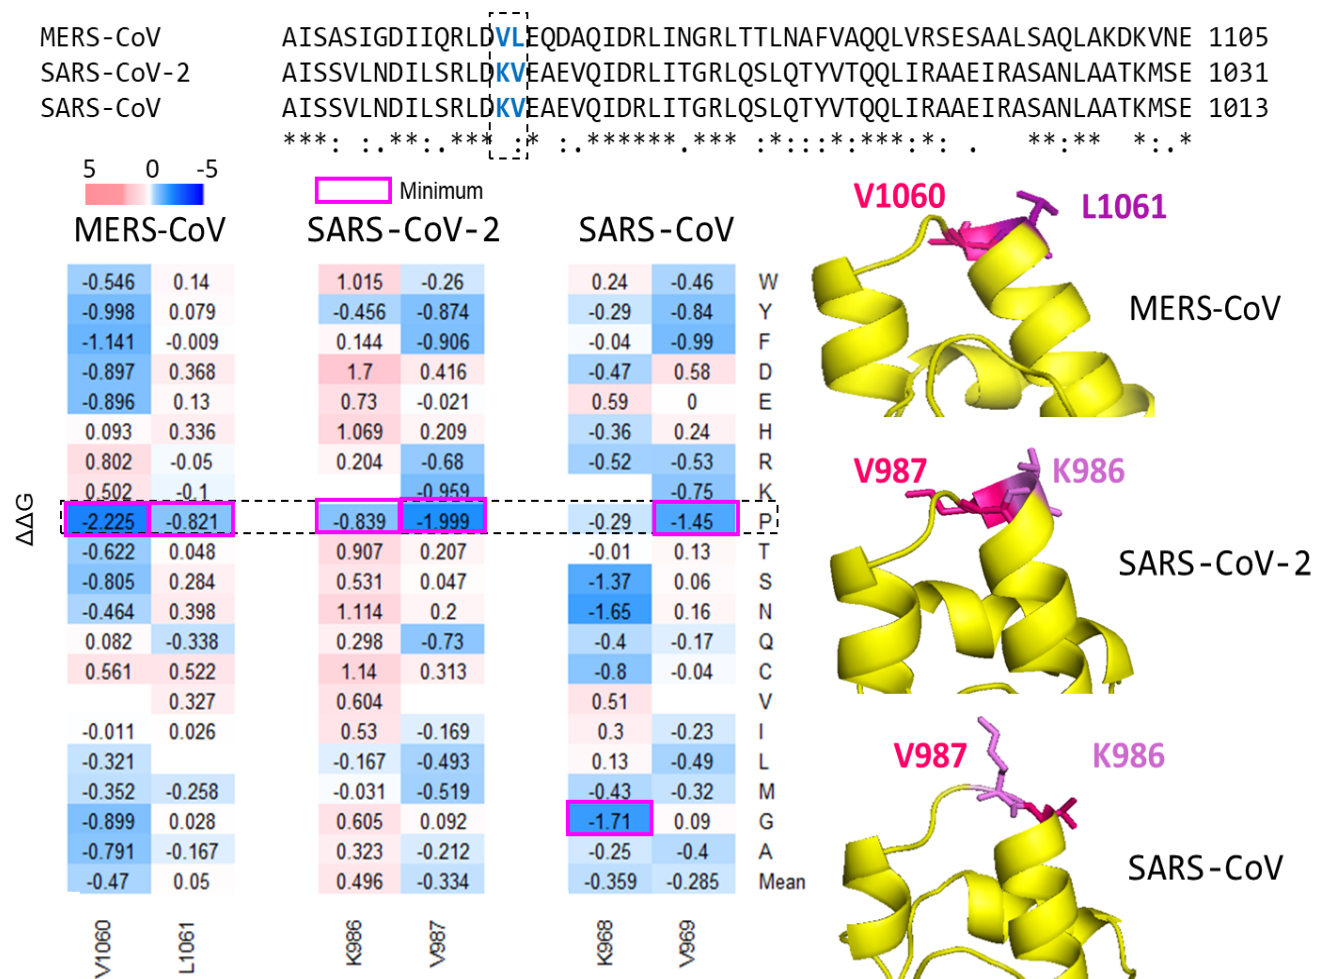

**Supplementary Figure 3.** Comparisons of 2P mutations among MERS-Cov, SARS-Cov-2 and SARS-Cov. The folding energy change ( $\Delta\Delta G$ ) is computed based on the monomer.

## RBD

Maximum Minimum

|        |        |       |        |       |       |        |        |       |        |       |        |        |        |        |        |        |        |        |        |        |      |
|--------|--------|-------|--------|-------|-------|--------|--------|-------|--------|-------|--------|--------|--------|--------|--------|--------|--------|--------|--------|--------|------|
| 0.628  | -0.229 | 1.816 | 0.81   | 6.491 | 2.11  | 0.002  | 8.731  | 1.071 | -0.022 | 1.83  | 2.198  | -0.377 | 0.017  | 0.365  | 17.418 | -0.465 | -0.459 | 3.118  | 2.394  | -0.74  | W    |
| -1.268 | -0.157 |       |        | 4.23  | 1.672 |        | 7.663  | 0.173 | -0.017 | -0.06 | 0.826  |        | -0.013 | 3.314  | 13.42  | 0.627  | -0.181 | 4.55   | 1.707  |        | Y    |
| 0.152  | 0.013  | 1.539 | 0.812  | 2.494 |       | -0.308 | 2.832  | 0.092 | -0.012 |       | 0.637  | -0.597 |        | 0.193  | 1.037  | 0.411  | -0.4   | 3.986  | 1.744  | -0.529 | F    |
| 1.09   | 0.139  | 1.922 | 1.849  | 2.618 | 3.579 | 0.27   | 0.633  | 2.273 | 0.052  | 2.998 | 1.484  | 3.271  | 0.032  | 1.441  | 3.104  | 1.843  | 0.371  | -0.346 | 3.8    | 1.02   | D    |
| 0.667  | 0.051  | 1.917 | 1.408  | 2.53  | 3.417 | 0.128  | 1.706  | 0.634 |        | 3.5   | 0.461  | 3.116  | 0.048  | 2.167  | 7.278  | 1.358  | 1.188  | 2.49   | 3.628  | 0.676  | E    |
| 0.177  | 0.077  | 0.036 | 1.575  | 2.802 | 2.513 | -0.018 | 1.422  | 0.513 | -0.009 | 3.358 | 0.479  | 1.038  | -0.015 | 0.645  | 5.654  | 0.402  | 0.043  | 0.949  | 2.428  | 1.096  | H    |
| 0.183  | -0.905 | 0.961 | -0.488 | 2.541 | 2.091 | 0.248  | 5.046  | 0.276 | -0.101 | 3.166 | -0.038 | 2.042  | -0.017 | -0.571 | 3.781  | 0.373  | 0.795  | 2.094  | 1.653  | -0.166 | R    |
|        | -0.01  | 1.114 | 1.059  | 1.914 | 1.767 | -0.146 | 3.266  | 0.834 | -0.059 | 2.791 | 0.128  | 1.956  | 0.021  | 0.704  | 4.1    | 0.313  | 0.79   | -2.134 | 1.641  | 0.474  | K    |
| 0.492  | -0.025 | 1.889 | 1.556  | 2.425 | 2.88  | 0.555  | 0.282  | 0.291 | 0.002  | 3.261 | 0.755  | 2.593  | 0.082  | 0.791  | -0.119 | -0.56  | 0.436  | -1.04  | 11.767 | -0.051 | P    |
| 0.543  | 0.069  | 1.763 | 1.562  | 1.341 | 2.9   | 0.168  | -0.075 | 0.603 | -0.008 | 3.302 | -0.75  | 2.567  | 0.019  | 0.892  | 3.411  | 0.592  |        | -1.346 | 3.856  | 0.517  | T    |
| 0.481  | 0.038  | 1.777 | 1.636  | 2.427 | 3.814 | 0.195  | 0.808  | 0.751 | -0.023 | 3.055 | 0.579  | 2.81   | 0.029  | 1.182  | 1.451  | -0.221 | 0.516  | -0.413 | 2.528  | 0.994  | S    |
| 0.481  | 0.041  | 1.7   | 1.568  | 1.889 | 3.145 | 0.223  | 1.119  | 0.777 | -0.019 | 3.615 |        | 2.73   | 0.011  | 0.679  | 4.164  | 0.681  | 0.551  |        | 2.322  | -0.083 | N    |
| 0.418  | 0.05   | 1.876 | 1.157  | 0.968 | 3.124 | 0.118  | 1.456  | 0.503 | -0.01  | 3.323 | -0.032 | 2.104  | 0.037  |        | 5.502  |        | 0.069  | -1.528 | 2.401  | 0.158  | Q    |
| 0.465  | 0.028  | 1.758 | 1.573  | 1.169 | 2.891 | 0.108  | -0.031 | 0.425 | -0.019 | 3.245 | 0.247  | 2.101  | 0.031  | 0.956  | 3.578  | 0.942  | 0.556  | -1.041 | 2.233  | 0.382  | C    |
| 0.506  | 0.052  | 1.762 | 1.271  | 0.966 | 2.414 | 0.104  | 0.288  | 0.237 | -0.014 | 3.046 | -0.075 | 1.121  | -0.007 | 0.621  | 4.593  | -1.527 | 0.078  | -1.29  | 3.136  | -0.188 | V    |
| 0.456  | 0.057  | 1.763 | 1.025  | 0.192 | 2.289 | 0.111  | 1.568  | 0.494 | -0.014 | 2.672 | 0.263  | 2.269  | 0.041  | 0.766  | 5.082  | 1.845  | 0.073  | -0.423 | 3.08   | 0.168  | I    |
| 0.512  | 0.024  | 1.732 | 1.477  |       | 1.522 | -0.004 | 0.99   | 0.779 | -0.015 | 1.216 | -0.362 | 0.581  | -0.014 | 0.477  | 2.665  | -1.561 | -0.328 | -2.397 | 1.601  | -0.341 | L    |
| 0.606  | -0.199 | 1.533 | 1.266  | 0.458 | 0.792 | -0.28  | 0.651  | 0.465 | 0.004  | 1.204 | -0.106 | 0.117  | -0.006 | -0.3   | 2.305  | 0.057  | -0.304 | -2.273 | 1.709  | -0.571 | M    |
| 0.597  |        | 1.821 | 1.243  | 2.667 | 3.288 | 0.301  | 0.521  |       | 0.006  | 3.924 | 0.805  | 2.913  | 0.043  | 1.19   |        | 1.284  | 1.209  | -0.149 |        | 1.741  | G    |
| 0.483  | 0.251  | 1.805 | 1.641  | 2.612 | 3.31  | 0.191  |        | 0.109 | -0.025 | 3.903 | 0.513  | 2.559  | 0.009  | 0.957  | 0.756  | 0.727  | 0.683  | -0.68  | 1.881  | 0.569  | A    |
| 0.404  | -0.033 | 1.601 | 1.263  | 2.249 | 2.606 | 0.103  | 2.046  | 0.595 | -0.016 | 2.808 | 0.301  | 1.838  | 0.01   | 0.867  | 4.694  | 0.181  | 0.299  | -0.15  | 2.922  | 0.27   | Mean |

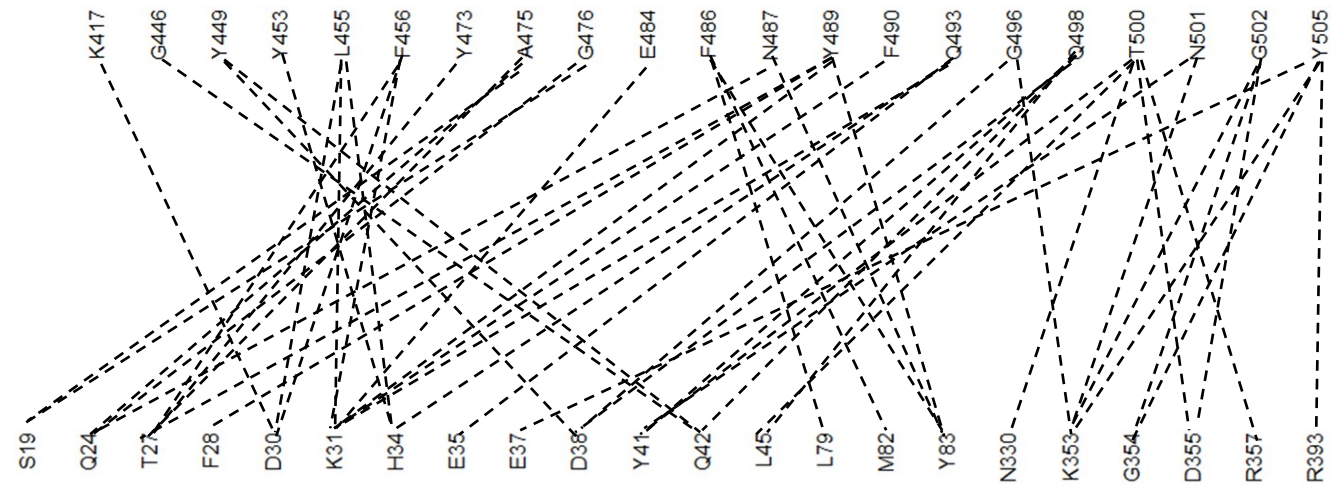

|       |        |        |        |        |        |        |        |        |       |        |       |        |        |       |        |        |        |        |        |       |       |      |
|-------|--------|--------|--------|--------|--------|--------|--------|--------|-------|--------|-------|--------|--------|-------|--------|--------|--------|--------|--------|-------|-------|------|
| 0.189 | -0.008 | 0.481  | 0.293  | 0.953  | 0.521  | 1.156  | 1.399  | 0.095  | 1.331 | 1.708  | 1.464 | 0.391  | 0.09   | 0.765 | 1.704  | -1.118 | 0.28   | 0.486  | 6.681  | 0.664 | 0.177 | W    |
| 0.653 | 3.353  | -0.738 | -0.126 | 0.559  | 0.724  | 0.22   | 0.985  | 0.968  | 0.415 |        | 1.537 | 0.071  | 0.134  | 1.129 |        | -0.774 | -1.676 | 0.218  | 7.284  | 3.43  | 0.2   | Y    |
| 0.654 | 0.917  | -1.839 |        | 1.117  | -0.701 | 0.255  | 0.927  | -0.215 | 1.985 | -0.279 | 1.538 | -0.181 | 0.433  | 1.077 | -0.431 | 1.326  | -1.937 | 0.876  | 1.01   | 1.154 | 0.249 | F    |
| 0.864 | 1.451  | 0.843  | -0.052 |        | 2.054  | -0.147 | 0.778  | 0.967  |       | -1.387 | 1.748 | 0.669  | 1.159  | 0.923 | 0.873  | 0.471  | 0.313  | 1.668  |        | 0.536 | 0.167 | D    |
| 0.802 | 0.348  | 0.103  | 0.022  | -0.337 | 1.915  | 0.463  |        |        | 2.106 | 0.652  | 1.644 | 0.54   | 1.018  | 0.651 | 0.839  | -0.251 | -0.619 | 1.191  | 1.755  | 1.176 | 0.199 | E    |
| 0.101 | 0.271  | 0.066  | 1.048  | 0.834  | 1.269  |        | 1.031  | 0.038  | 1.129 | 0.773  | 0.562 | 0.541  | 0.751  | 1.509 | 0.233  | -0.301 | -0.392 | 0.618  | 2.535  | 0.426 | 0.25  | H    |
| 0.933 | -0.851 | 0.252  | 0.055  | 1.688  | 0.173  | -0.421 | 1.014  | 0.447  | 2.295 | -0.419 | 0.069 | 0.253  | 0.381  | 1.037 | 0.845  | -0.358 | 0.167  | 1.457  | 4.139  |       |       | R    |
| 0.763 | -0.006 | -0.392 | -0.027 | 0.084  |        | 1.285  | 0.854  | 0.437  | 2.026 | -0.807 | 1.437 | 0.431  | 0.413  | 0.576 | 0.229  | -0.523 |        | 1.005  | 1.308  | 0.505 | 0.317 | K    |
| 0.962 | 0.647  | 0.817  | 1.059  | 1.063  | 4.036  | 1.861  | 0.879  | 0.563  | 2.463 | -1.808 | 1.73  | 0.654  | 0.964  | 1.548 | 0.415  | 0.034  | -1.129 | -0.052 | 2.154  | 0.462 | 0.251 | P    |
| 0.375 | -0.173 |        | 0.445  | 0.25   | 0.626  | 0.873  | 1.034  | -0.148 | 2.017 | -1.293 | 1.375 | 0.405  | 0.443  | 1.36  | 0.749  | -0.496 | -0.383 | 3.141  | 1.639  | 0.4   | 0.183 | T    |
|       | 0.293  | 1.419  | 0.036  | 1.28   | 2.248  | 1.428  | 1.087  | -0.102 | 2.008 | -1.173 | 1.562 | 0.521  | 1.099  | 1.54  | 0.665  | -0.044 | -1.328 | 1.885  | 1.788  | 0.241 | 0.183 | S    |
| 0.106 | 0.061  | 0.933  | 1.069  | 0.458  | 0.869  | 0.464  | -0.454 | 0.252  | 0.343 | -1.676 | 1.339 | 0.67   | 0.936  | 1.436 | 0.617  |        | -1.415 | 1.881  | 1.338  | 0.388 | 0.184 | N    |
| 0.846 |        | -0.091 | -0.165 | -0.089 | 1.09   | 0.796  | -0.085 | 0.325  | 2.078 | -0.777 |       | -0.112 | 0.94   | 1.142 | 0.349  | -0.411 | 0.311  | 1.498  | 1.926  | 0.473 | 0.226 | Q    |
| 0.789 | 0.019  | 0.015  | -0.06  | 0.465  | 1.312  | 1.003  | 0.562  | -0.283 | 2.304 | -0.96  | 1.578 | 0.429  | 0.675  | 1.574 | 0.663  | -0.364 | -1.87  | 1.357  | 0.203  | 0.377 | 0.183 | C    |
| 0.945 | -0.107 | -0.702 | 0.068  | 0.069  | 0.993  | 0.295  | 0.553  | 0.108  | 2     | -1.071 | 1.451 | 0.335  | 0.399  | 1.863 | 0.436  | -0.612 | 2.26   | 2.176  | 0.285  | 0.439 | 0.183 | V    |
| 0.916 | 0.3    | -0.968 | -0.111 | -0.118 | 0.697  | 1.347  | 1.431  | 0.998  | 1.981 | -0.852 | 1.258 | 0.352  | 0.249  | 0.533 | 0.4    | -0.393 | 2.737  | 1.886  | 2.245  | 0.477 | 0.2   | I    |
| 0.723 | -1.267 | -0.77  | -0.085 | -0.472 | 0.255  | 0.427  | 0.586  | 0.485  | 1.873 | -1.109 | 1.458 |        |        | 0.488 | 0.302  | -0.878 | -1.521 | 1.14   | 1.502  | 0.496 | 0.183 | L    |
| 0.476 | -0.554 | -1.078 | 0.102  | -0.201 | -0.34  | 0.959  | 0.927  | 0.472  | 2.091 | -1.192 | 1.467 | 0.011  | -0.099 |       | -0.371 | -0.971 | -0.851 | 1.141  | 1.144  | 0.284 | 0.203 | M    |
| 1.119 | 0.674  | 1.943  | 0.124  | 1.788  | 2.659  | 2.376  | 0.312  | 0.425  | 2.502 | -1.492 | 1.67  | 0.544  | 1.065  | 1.72  | 1.142  | 0.078  | -0.876 |        | -0.382 | 0.397 | 0.246 | G    |
| 0.661 | 0.482  | 0.621  | 0.176  | 0.979  | 1.638  | 1.488  | 0.407  | 0.212  | 2.352 | -0.937 | 1.568 | 0.512  | 1.02   | 1.736 | 0.609  | -0.115 | -0.993 | 1.097  | 0.043  | 0.397 | 0.183 | A    |
| 0.678 | 0.308  | 0.048  | -0.019 | 0.546  | 1.084  | 0.849  | 0.667  | 0.114  | 1.858 | -0.742 | 1.392 | 0.287  | 0.59   | 1.19  | 0.54   | -0.44  | -0.47  | 1.298  | 2.031  | 0.67  | 0.209 | Mean |

## ACE2

**Supplementary Figure 4.** Heatmaps show the  $\Delta\Delta G$  of the mutations in RBD residues and ACE2 residues that make van der Waals contacts. Maximum (yellow) and Minimum (magenta)  $\Delta\Delta G$  values are labelled for each residue position.

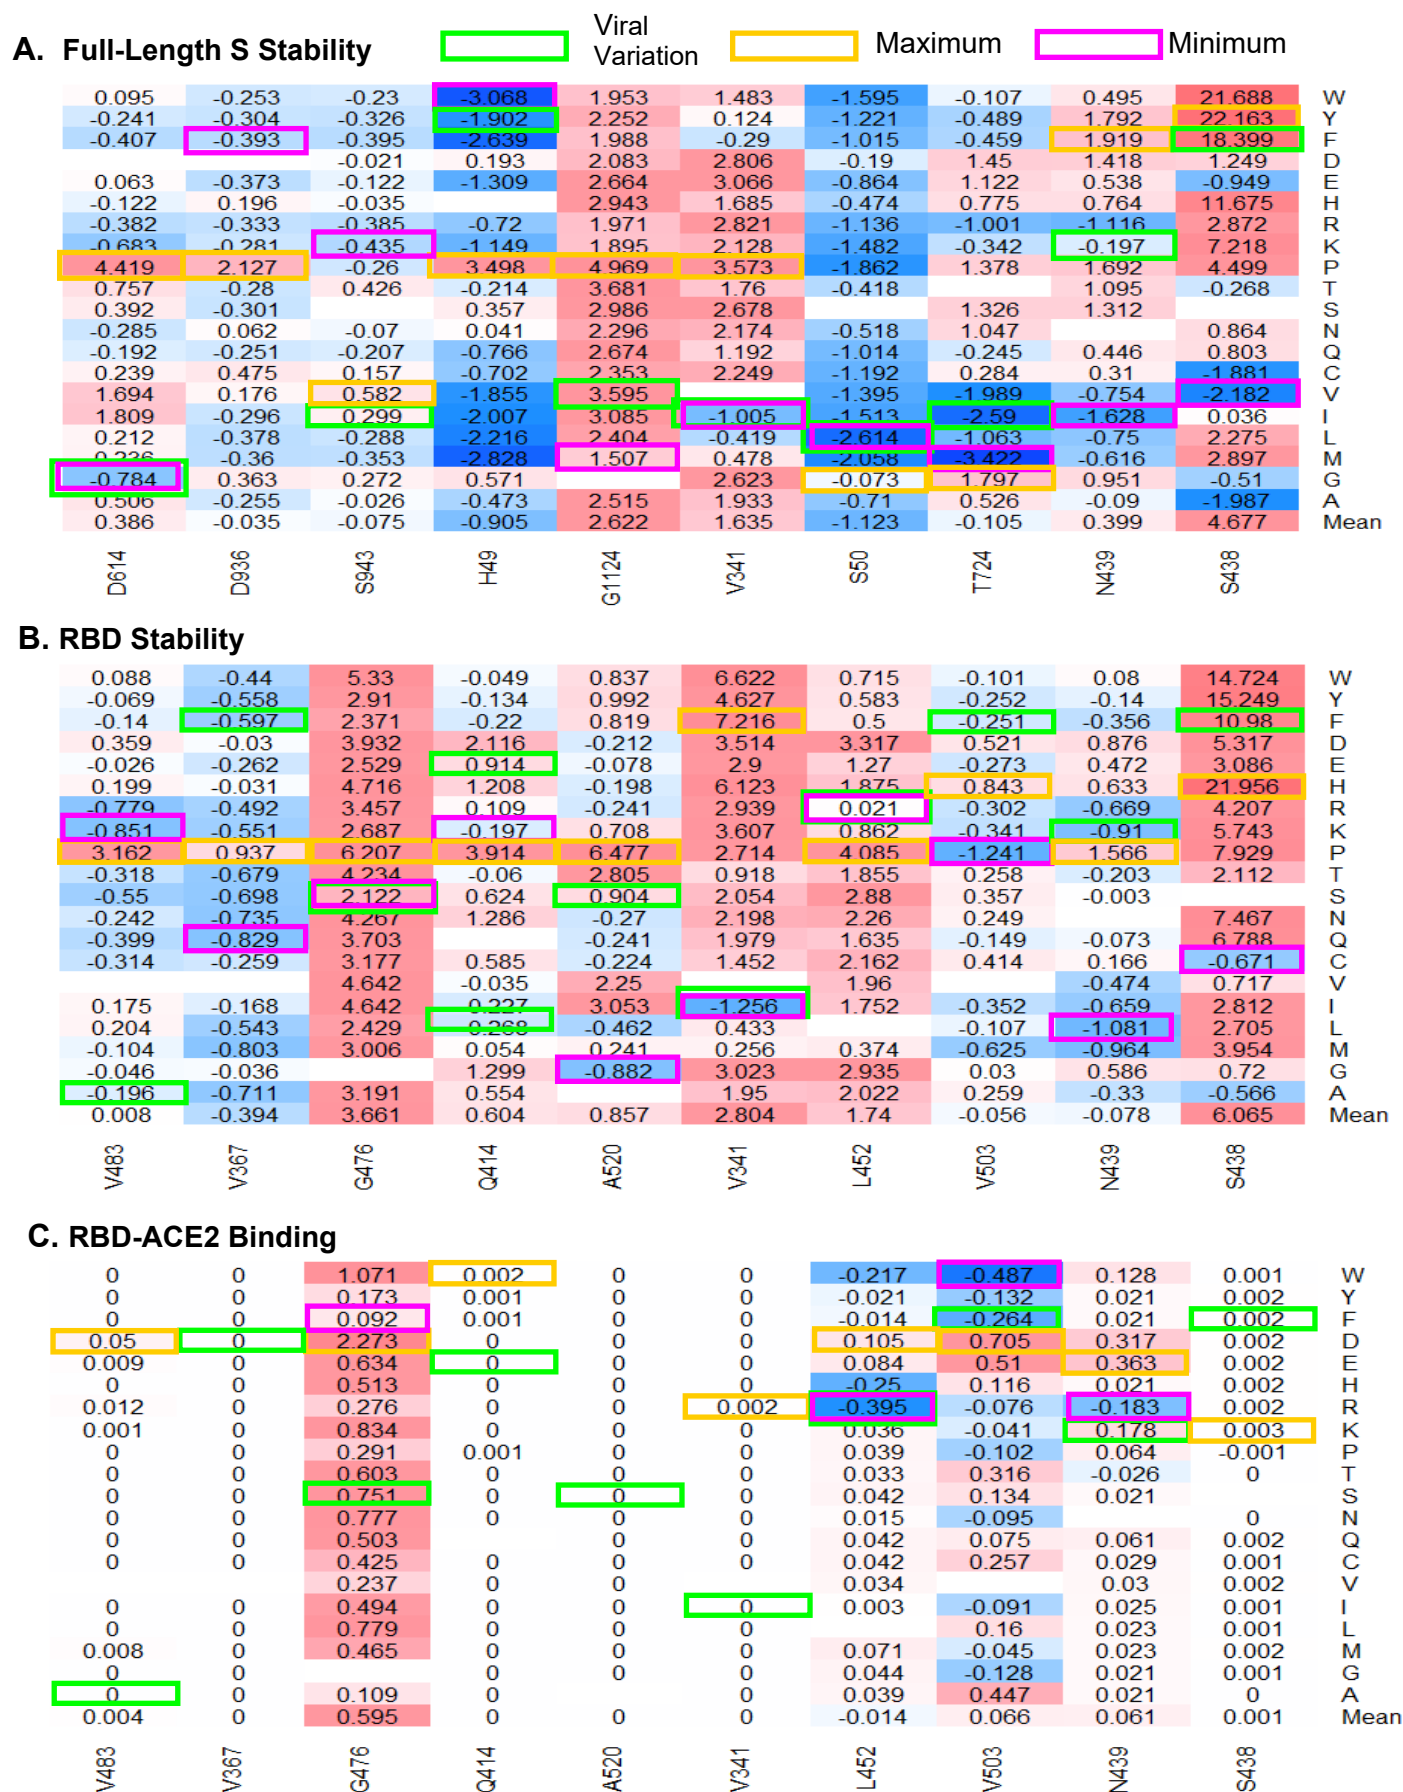

**Supplementary Figure 5.** Heatmaps of viral mutations (green) for (A) Full-length S stability ( $\Delta\Delta G$ ), (B) RBD stability  $\Delta\Delta G$  and (C) RBD-ACE2 binding affinity ( $\Delta\Delta\Delta G$ ). Maximum (yellow) and Minimum (magenta)  $\Delta\Delta G$  /  $\Delta\Delta\Delta G$  values are labelled for each residue position. The folding energy change ( $\Delta\Delta G$ ) is computed based on the monomer.

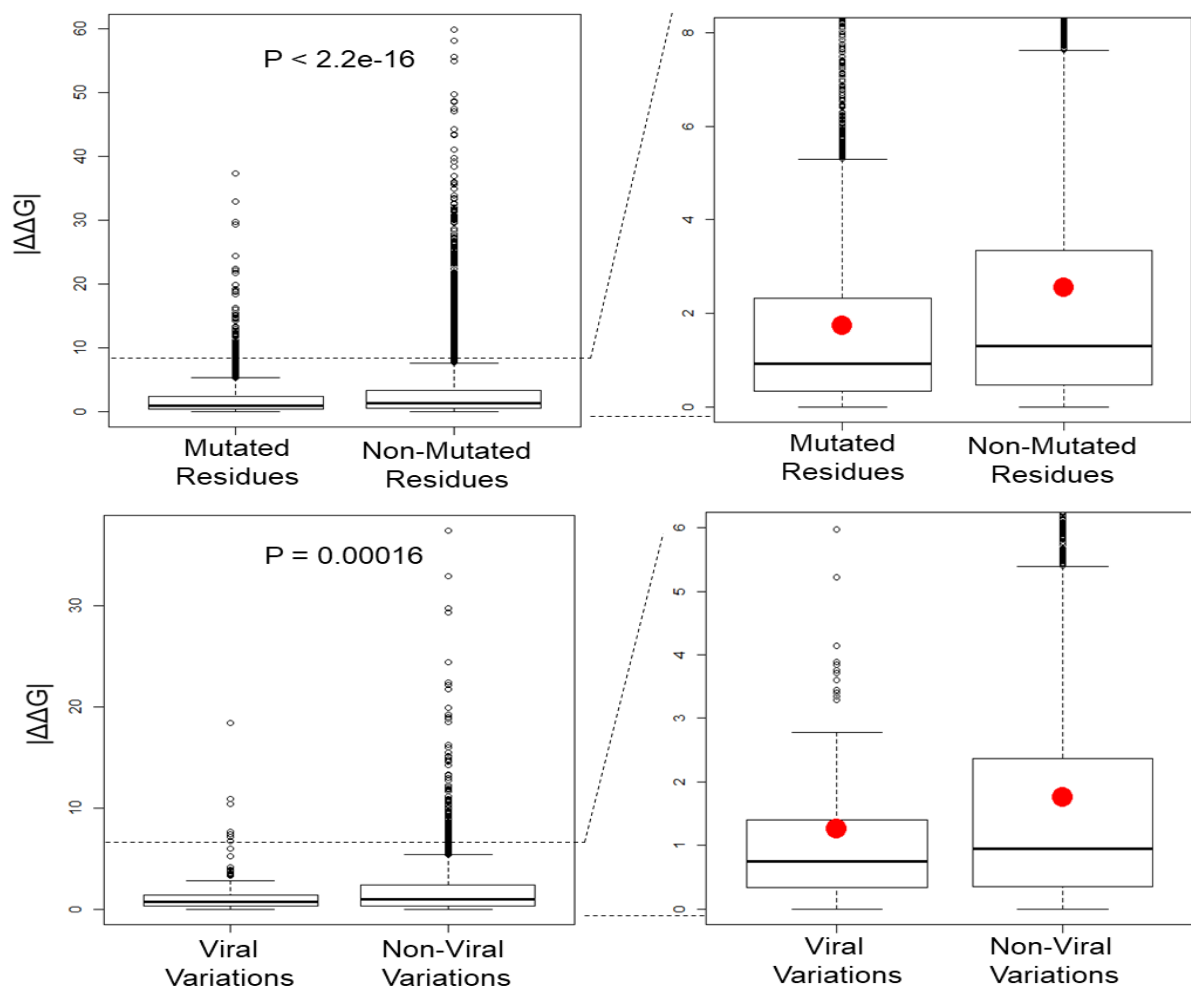

**Supplementary Figure 6.** Boxplots for the  $|\Delta\Delta G|$  of mean of residues with and without viral mutations (upper) and  $|\Delta\Delta G|$  of viral mutations and other computationally predicted mutations in the same positions (lower). The mean values are shown as red dots. The folding energy change ( $\Delta\Delta G$ ) is computed based on the monomer.
